# Supplementary material
Source: PubMed Central journal article supplement (PMC11077543)
Supplement: 10-1055-a-2169-1480-2023-03-1838.pdf [file 10-1055-a-2169-1480-2023-03-1838.pdf]

## Supplement Tabelle 1: Datengrundlage zur Berechnung der Bewertungssätze

| Multiplikatoren            | Art                                                                                                                                                                                                     | Kostengruppe                                                                                                                    | Anmerkung                                          | Berechnung                                                                                                                                                                                                                                                                                                           |                                                                                                                                                                                            |
|----------------------------|---------------------------------------------------------------------------------------------------------------------------------------------------------------------------------------------------------|---------------------------------------------------------------------------------------------------------------------------------|----------------------------------------------------|----------------------------------------------------------------------------------------------------------------------------------------------------------------------------------------------------------------------------------------------------------------------------------------------------------------------|--------------------------------------------------------------------------------------------------------------------------------------------------------------------------------------------|
| Private Krankenkasse       | Ärzte, Zahnärzte, Heilmittel, Hilfsmittel, Rehabilitation                                                                                                                                               | Verband der Ersatzkasse (VDEK) [1, 2], Ergebnisse der GKV-Statistik KM1 des Bundes [3, 4]                                       | Individuelle Berechnung für jede Kostengruppe      | $MP_{PKV \text{ je Kostengruppe}} = \frac{\text{Anzahl Versicherte GKV}_{\text{Jahr}} / (\text{Anzahl Versicherte GKV}_{\text{Jahr}} + \text{Anzahl Versicherte PKV}_{\text{Jahr}})}{\text{Gesamtausgaben GKV}_{\text{Jahr}} / (\text{Gesamtausgaben GKV}_{\text{Jahr}} + \text{Gesamtausgaben PKV}_{\text{Jahr}})}$ |                                                                                                                                                                                            |
| Zuzahlungsmultiplikator    | Ärzte                                                                                                                                                                                                   | Gesundheitsausgabenrechnung des Bundes 2019 & 2020 [5]                                                                          |                                                    | $ZMP_{\text{Ärzte}} = \frac{\text{Gesamtausgaben GKV}_{\text{Jahr}} + \text{Zuzahlungen GKV}_{\text{Jahr}}}{\text{Gesamtausgaben GKV}_{\text{Jahr}}}$                                                                                                                                                                |                                                                                                                                                                                            |
|                            | Zahnärzte                                                                                                                                                                                               | Gesundheitsausgabenrechnung des Bundes 2019 & 2020 [5, 6]                                                                       |                                                    | $ZMP_{\text{Zahnärzte}} = \frac{\text{Gesamtausgaben GKV}_{\text{Jahr}} + \text{Zuzahlungen GKV}_{\text{Jahr}}}{\text{Gesamtausgaben GKV}_{\text{Jahr}}}$                                                                                                                                                            |                                                                                                                                                                                            |
|                            | Heilmittel                                                                                                                                                                                              | Finanzergebnisse des Bundes, KV45 Statistik 2019 & 2020 [7, 8]                                                                  |                                                    | $ZMP_{\text{Heilmittel}} = \frac{\text{Gesamtausgaben GKV}_{\text{Jahr}} + \text{Zuzahlungen GKV}_{\text{Jahr}}}{\text{Gesamtausgaben GKV}_{\text{Jahr}}}$                                                                                                                                                           |                                                                                                                                                                                            |
|                            | Hilfsmittel                                                                                                                                                                                             | Finanzergebnisse des Bundes, KV45 Statistik 2019 & 2020 [7, 8]                                                                  |                                                    | $ZMP_{\text{Hilfsmittel}} = \frac{\text{Gesamtausgaben GKV}_{\text{Jahr}} + \text{Zuzahlungen GKV}_{\text{Jahr}}}{\text{Gesamtausgaben GKV}_{\text{Jahr}}}$                                                                                                                                                          |                                                                                                                                                                                            |
|                            | Rehabilitation                                                                                                                                                                                          | Finanzergebnisse des Bundes, KV45 Statistik 2019 & 2020 [7, 8]                                                                  |                                                    | $ZMP_{\text{Rehabilitation}} = \frac{\text{Gesamtausgaben GKV}_{\text{Jahr}} + \text{Zuzahlungen GKV}_{\text{Jahr}}}{\text{Gesamtausgaben GKV}_{\text{Jahr}}}$                                                                                                                                                       |                                                                                                                                                                                            |
| Laborärzte                 | Labor                                                                                                                                                                                                   | Kassenärztliche Bundesvereinigung, Honorarbericht für das vierte Quartal 2019 & 2020, Kennzahlen der Abrechnungsgruppen [9, 10] | Honorarumsatz der Laboratoriumsmedizin 2019 & 2020 | $MP_{\text{Labor}} = \frac{\text{Honorarausgaben Laboratoriumsmedizin}_{\text{Jahr}}}{\text{Summe Honorarausgaben aller Abrechnungsgruppen}_{\text{Jahr}}}$                                                                                                                                                          |                                                                                                                                                                                            |
| Sektor                     | Bewertungssatz                                                                                                                                                                                          | Messeinheit                                                                                                                     | Datenquelle                                        | Verwendete Daten                                                                                                                                                                                                                                                                                                     | Kostenkalkulation für 2019 und 2020                                                                                                                                                        |
| Ambulant-ärztlicher Sektor | Hausärzte<br>Frauenärzte<br>Orthopäden<br>Fachärztliche<br>Internisten<br>Kinderärzte<br>Augenärzte<br>Hautärzte<br>HNO-Ärzte<br>Chirurgen<br>Urologen<br>Nervenärzte<br>Psychotherapeuten<br>Zahnärzte | Kontakt                                                                                                                         | Kassenärztliche Bundesvereinigung                  | Honorarbericht für das vierte Quartal 2019 & 2020, Kennzahlen der Abrechnungsgruppen [9, 10]                                                                                                                                                                                                                         | $\text{Bewertungssatz}_{\text{Arzt}} = \frac{\text{Gesamtausgaben GKV}_{\text{Arzt}}}{\text{Summe der Kontakte von GKV Patienten}_{\text{Arzt}}} \times MP_{PKV} \times MP_{\text{Labor}}$ |

|             |                                                                                                                                                                                                                                                                                                                                                                                                                                                                                                                                                                                                                                                                                                                                             |         |                                             |                                                                                                       |                                                                                                              |
|-------------|---------------------------------------------------------------------------------------------------------------------------------------------------------------------------------------------------------------------------------------------------------------------------------------------------------------------------------------------------------------------------------------------------------------------------------------------------------------------------------------------------------------------------------------------------------------------------------------------------------------------------------------------------------------------------------------------------------------------------------------------|---------|---------------------------------------------|-------------------------------------------------------------------------------------------------------|--------------------------------------------------------------------------------------------------------------|
| Heilmittel  | Logopädie<br>Physiotherapie<br>Ergotherapie<br>Podologie                                                                                                                                                                                                                                                                                                                                                                                                                                                                                                                                                                                                                                                                                    | Kontakt | GKV-Spitzenverbandes                        | Heilmittelinformationssystem<br>(HIS) des GKV-Spitzenverbandes,<br>Bundesbericht 2019 & 2020 [11, 12] | $Bewertungssatz_{Heilmittel}$<br>= $Bruttoausgaben\ je\ Behandlungseinheit_{Heilmittel} \times MP_{PKV}$     |
| Hilfsmittel | Absauggeräte<br>Adaptionshilfen<br>Applikationshilfen<br>Badehilfen<br>Bandagen<br>Bestrahlungsgeräte<br>Blindenhilfsmittel<br>Einlagen<br>Elektrostimulationsgeräte<br>Gehhilfen<br>Hilfsmittel gegen Dekubitus<br>Hilfsmittel bei Tracheostoma<br>Hörhilfen<br>Inhalations- und Atemtherapiegeräte<br>Inkontinenzhilfen<br>Kommunikationshilfen<br>Hilfsmittel zur Kompressionstherapie<br>Kranken- / Behindertenfahrzeuge<br>Krankenpflegeartikel<br>Lagerungshilfen<br>Messgeräte für Körperzustände / -funktionen<br>Mobilitätshilfen<br>Orthesen / Schienen<br>Prothesen<br>Sehhilfen<br>Sitzhilfen<br>Sprechhilfen<br>Stehhilfen<br>Stomaartikel<br>Schuhe<br>Therapeutische Bewegungsgeräte<br>Toilettenhilfen<br>Pflegehilfsmittel | Stück   | Heil- und Hilfsmittelreports der Barmer GEK | Gesellschaftliche Kosten einzelner Hilfsmittel                                                        | $Bewertungssatz_{Hilfsmittel\ i}$<br>= $Gesellschaftliche\ Kosten_{Hilfsmittel\ i} \times ZMP_{Hilfsmittel}$ |

|                   |                                      |        |                                                                                                                                       |                                                                                                                           |                                                                                                                                                                                                                                                                                                                                               |
|-------------------|--------------------------------------|--------|---------------------------------------------------------------------------------------------------------------------------------------|---------------------------------------------------------------------------------------------------------------------------|-----------------------------------------------------------------------------------------------------------------------------------------------------------------------------------------------------------------------------------------------------------------------------------------------------------------------------------------------|
|                   | Zahnersatz                           | Fall   | Finanzergebnisse des Bundes, KV45 Statistik 2019 & 2020 [7, 8]                                                                        | Fälle und Ausgaben § 55 Abs. 2 SGB V ;Fälle und Ausgaben § 55 Abs. 3 SGB V                                                | Gewichteter Mittelwert der Fälle und Ausgaben nach § 55 Abs. 2 SGB V und § 55 Abs. 3 SGB V                                                                                                                                                                                                                                                    |
| Krankenhäuser     | Stationär / Teilstationär            | Tag    | Bundesgesundheitsministerium – Betriebswirtschaftliche Eckdaten der Krankenhäuser [13], Grunddaten der Krankenhäuser 2019 & 2020 [14] | Ausgaben allgemeine Krankenhäuser, Allgemeine Station, Intensivstation, Psychiatrische Krankenhäuser; Belegungstage,      | Berechnung folgt Tabelle 4 von Bock et al [15], in der alle einzelnen Berechnungskomponenten aufgelistet und detailliert für 2019 und 2020 gemäß der hier angegebenen Quellen nachberechnet werden können.                                                                                                                                    |
| Rehabilitation    | Stationär                            | Tag    | Rechnungsergebnisse der gesetzlichen Krankenkassen, Deutsche Rentenversicherung                                                       | KJ-1 Statistik 2019 & 2020 [16]; Statistikband Rehabilitation 2019 & 2021 [17, 18]                                        | $\text{Bewertungssatz}_{\text{Reha-Stationäre}} = \frac{(\text{Ausgaben GKV} + \text{GRV}) \times \text{ZMP}_{\text{Rehabilitation}}}{\text{Summe der Rehatage GKV} + \text{GRV}}$ <p>Ausgaben und Rehatage der GVK und GRV entsprechen den Zahlen der Positionen 506, 502, 503, 504, 505, 464, 465, 508, 542 der KJ1 Statistik der Jahre</p> |
|                   | Ambulant                             | Tag    | Rechnungsergebnisse der gesetzlichen Krankenkassen, Deutsche Rentenversicherung                                                       | KJ-1 Statistik 2019 & 2020 [16]; Statistikband Rehabilitation 2019 & 2021 [17, 18]                                        | $\text{Kostensatz}_{\text{Reha-Ambulant}} = \frac{(\text{Ausgaben GKV} + \text{GRV}) \times \text{ZMP}_{\text{Rehabilitation}}}{\text{Summe Rehatage}}$ <p>Ausgaben und Rehatage der GVK und GRV entsprechen der Zahlen der die Positionen 546, 547, 500 und 501 der KJ1 Statistik.</p>                                                       |
| Informelle Pflege | Substitutionskostenansatz            | Stunde | Statistisches Bundesamt, Statistisches Amt der Europäischen Union                                                                     | Sonderauswertung des Statistischen Bundesamtes Wirtschaftszweig Q881; Lohnnebenkosten je 100€ in Deutschland [19]         | $\text{Bewertungssatz}_{\text{IP Sub}} = \text{Stundenlohn Q881}_{\text{Jahr}} \times \text{Lohnnebenkosten}_{\text{Jahr}}$                                                                                                                                                                                                                   |
|                   | Opportunitätskostenansatz (Arbeit)   | Stunde | Statistisches Bundesamt                                                                                                               | Arbeitskosten [20]                                                                                                        | $\text{Bewertungssatz}_{\text{IP OA}} = \text{Arbeitskosten}_{\text{Jahr}}$                                                                                                                                                                                                                                                                   |
|                   | Opportunitätskostenansatz (Freizeit) | Stunde | Volkswirtschaftliche Gesamtrechnung der Bundes [21]                                                                                   | Nettolohn Pflege 2019 & 2020 , Arbeitnehmerentgelt 2019 & 2020                                                            | $\begin{aligned} \text{Bewertungssatz}_{\text{IP OPF}} &= \emptyset \text{Nettolohn}_{\text{Jahr}} \\ &+ \emptyset \text{Arbeitnehmerentgelt}_{\text{Jahr}} \\ &\times (\% \text{ Anteil Rentenversicherung}_{\text{Jahr}} \\ &+ \% \text{ Arbeitslosenversicherung}_{\text{Jahr}}) \end{aligned}$                                            |
| Ambulante Pflege  | Pflege                               | Minute | Landesvertretung der Ersatzkassen - Bayern                                                                                            | Vergütungsvereinbarungen für Wohlfahrtsverbände Bayern, Anlage 1, Vergütung der Leistungskomplexe, LK17, 2019 & 2020 [22] | $\text{Bewertungssatz}_{\text{AP P}} = \text{Arbeitskosten}_{\text{Jahr}}$                                                                                                                                                                                                                                                                    |
|                   | Hauswirtschaft                       | Minute | Landesvertretung der Ersatzkassen - Bayern                                                                                            | Vergütungsvereinbarungen für Wohlfahrtsverbände Bayern, Anlage 1,                                                         | Entspricht dem Vergütungssatz des Leistungskomplexes                                                                                                                                                                                                                                                                                          |

|                        |                |         |                                                               |                                                                                                                                                                                                      |                                                      |
|------------------------|----------------|---------|---------------------------------------------------------------|------------------------------------------------------------------------------------------------------------------------------------------------------------------------------------------------------|------------------------------------------------------|
|                        |                |         |                                                               | Vergütung der Leistungskomplexe, LK9 2019 & 2020 [22]                                                                                                                                                |                                                      |
|                        | Anfahrtskosten | Kontakt | Landesvertretung der Ersatzkassen - Bayern                    | Vergütungsvereinbarungen für Wohlfahrtsverbände Bayern, Anlage 1, Vergütung der Leistungskomplexe, Anfahrtspauschale, 2019 & 2020 [22]                                                               | Entspricht dem Vergütungssatz des Leistungskomplexes |
| Stationäre Dauerpflege | Stationär      | Tag     | Verband der Ersatzkasse (VDEK)<br><br>Statistisches Bundesamt | Kassenanteil, Einrichtungseinheitlicher Eigenanteil, Unterkunft und Verpflegung 2019 & 2020 [1, 2]; Anzahl Pflegebedürftige nach Pflegegrad; Bruttolöhne in der Pflege 2019 & 2020 (Quelle einfügen) | Summe der täglichen Kosten                           |
|                        | Teilstationär  | Tag     | Verband der Ersatzkasse (VDEK)<br><br>Statistisches Bundesamt | Kassenanteil, Einrichtungseinheitlicher Eigenanteil, Unterkunft und Verpflegung 2019 & 2020 [1, 2]; Anzahl Pflegebedürftige nach Pflegegrad; Bruttolöhne in der Pflege 2019 & 2020 (Quelle einfügen) | 50% des stationären Tagessatzes                      |
|                        | Kurzzeitpflege | Tag     | Verband der Ersatzkasse (VDEK)<br><br>Statistisches Bundesamt | Kassenanteil, Einrichtungseinheitlicher Eigenanteil, Unterkunft und Verpflegung 2019 & 2020 [1, 2]; Anzahl Pflegebedürftige nach Pflegegrad; Bruttolöhne in der Pflege 2019 & 2020 (Quelle einfügen) | Summe der täglichen Kosten                           |

#### Referenzen

1. Verband der Ersatzkassen. Basisdaten des Gesundheitswesens 2018/2019. 2019.
2. Verband der Ersatzkassen. Basisdaten des Gesundheitswesens 2020. 2020.
3. Bundesgesundheitsministerium Deutschland. Ergebnisse der GKV-Statistik KM1. 2019.
4. Bundesgesundheitsministerium Deutschland. Ergebnisse der GKV-Statistik KM1 2020. 2020.
5. Statistisches Bundesamt Deutschland. Gesundheitsausgabenrechnung in Deutschland. 2019-2020.
6. Kassenzahnärztliche Bundesvereinigung. Zahnärzte-Praxis-Panel (ZäPP). In: Online: Kassenzahnärztliche Bundesvereinigung,; 2021:
7. Bundesgesundheitsministerium. Finanzergebnisse der GKV K45 Statistik, 4. Quartal 2020. 2020.
8. Bundesgesundheitsministerium Deutschland. Finanzergebnisse der GKV K45 Statistik, 4. Quartal 2019. 2019.
9. Kassenzahnärztliche Bundesvereinigung. Honorarbericht für das vierte Quartal 2019. 2019.
10. Kassenzahnärztliche Bundesvereinigung. Honorarbericht für das vierte Quartal 2020. 2020.
11. Spitzenverband Bund der Krankenkassen. HIS Bundesbericht 4. Quartal 2019,;. 2019.
12. Spitzenverband Bund der Krankenkassen. HIS Bundesbericht 4. Quartal 2020,;. 2020.
13. Bundesgesundheitsministerium Deutschland. Betriebswirtschaftliche Eckdaten der Krankenhäuser. 2019 & 2020.
14. Statistisches Bundesamt Deutschland. Grunddaten der Krankenhäuser - Krankenhausstatistik. 2019 - 2020.
15. Bock J-O, Brettschneider C, Seidl H et al. Ermittlung standardisierter Bewertungssätze aus gesellschaftlicher Perspektive für die gesundheitsökonomische Evaluation. Das Gesundheitswesen 2015; 77: 53-61.
16. Bundesgesundheitsministerium. KJ 1-Statistik (gesetzliche Krankenversicherung: endgültige Rechnungsergebnisse). 2019-2020.
17. Deutsche Rentenversicherung. Statistikband 2019. 2019.
18. Deutsche Rentenversicherung. Statistikband Rehabilitation 2020. 2020.
19. Statistisches Amt der Europäischen Union. Arbeitskosten in der EU. 2020.
20. Statistisches Bundesamt Deutschland. Statistisches Jahrbuch 2019. 2019.
21. Statistisches Bundesamt Deutschland. Volkswirtschaftliche Gesamtrechnung - Inlandsprodukt. 2019 & 2020.
22. Verband der Ersatzkassen Landesvertretung Bayern. Vergütungsvereinbarungen für Wohlfahrtsverbände. 2019-2020.
